# Supplementary material
Source: PubMed Central journal article supplement (PMC5761059)
Supplement: NIHMS930046-supplement-supplement_1.pdf [file NIHMS930046-supplement-supplement_1.pdf]

Supplementary Table 1. Cause-specific mortality by body size at different ages in the Golestan Cohort Study

|                                         |                      | <b>All medical causes<sup>a</sup></b><br><b>HR (95% CI)</b> | <b>Cardiovascular</b><br><b>HR (95% CI)</b> | <b>Cancer</b><br><b>HR (95% CI)</b> |
|-----------------------------------------|----------------------|-------------------------------------------------------------|---------------------------------------------|-------------------------------------|
| Body size at 15-<br>women               | 1                    | 1.05 (0.85,1.28)                                            | 1.06 (0.81,1.39)                            | 1.03 (0.67,1.56)                    |
|                                         | 2                    | 1                                                           | 1                                           | 1                                   |
|                                         | 3                    | 1.06 (0.83,1.36)                                            | 1.12 (0.81,1.55)                            | 0.97 (0.57,1.63)                    |
|                                         | 4                    | 1.23 (0.94,1.59)                                            | 1.04 (0.72,1.51)                            | 1.45 (0.86,2.43)                    |
|                                         | 5                    | 1.36 (1.07,1.75)**                                          | 1.41 (1.02,1.95)*                           | 1.43 (0.86,2.39)                    |
|                                         | 6                    | 1.23 (0.95,1.59)                                            | 1.26 (0.89,1.76)                            | 1.50 (0.90,2.51)                    |
|                                         | 7                    | 1.54 (1.17,2.04)**                                          | 1.51 (1.04,2.19)*                           | 1.89 (1.08,3.31)**                  |
|                                         | >=8                  | 1.59 (1.27,1.99)**                                          | 1.50 (1.11,2.03)**                          | 1.75 (1.09,2.80)**                  |
| per 1 level increase                    | 1.07 (1.04-1.09)**   | 1.06 (1.02-1.09)*                                           | 1.09 (1.04-1.15)**                          |                                     |
| Body size at 30-<br>women               | 1                    | 0.90 (0.65,1.25)                                            | 0.97 (0.63,1.48)                            | 1.05 (0.55,2.01)                    |
|                                         | 2                    | 1                                                           | 1                                           | 1                                   |
|                                         | 3                    | 0.91 (0.74,1.13)                                            | 0.96 (0.72,1.28)                            | 1.08 (0.70,1.66)                    |
|                                         | 4                    | 1.12 (0.91,1.40)                                            | 1.04 (0.78,1.40)                            | 1.16 (0.74,1.82)                    |
|                                         | 5                    | 1.23 (0.99,1.52)                                            | 1.11 (0.83,1.49)                            | 1.70 (1.11,2.58)**                  |
|                                         | 6                    | 1.39 (1.12,1.73)**                                          | 1.50 (1.12,2.00)**                          | 1.21 (0.74,1.97)                    |
|                                         | 7                    | 1.43 (1.10,1.86)**                                          | 1.48 (1.05,2.09)**                          | 1.26 (0.70,2.27)                    |
|                                         | >=8                  | 1.46 (1.10,1.93)**                                          | 1.49 (1.03,2.16)**                          | 1.44 (0.78,2.67)                    |
| per 1 level increase                    | 1.09 (1.05-1.12)**   | 1.09 (1.04-1.13)**                                          | 1.06 (0.99-1.14)                            |                                     |
| Body size at cohort<br>baseline- women  | 1                    | 1.12 (0.90,1.40)                                            | 1.22 (0.90,1.65)                            | 0.92 (0.57,1.46)                    |
|                                         | 2                    | 1                                                           | 1                                           | 1                                   |
|                                         | 3                    | 0.91 (0.73,1.12)                                            | 1.10 (0.83,1.47)                            | 0.72 (0.47,1.12)                    |
|                                         | 4                    | 0.77 (0.61,0.96)**                                          | 0.78 (0.57,1.07)                            | 0.83 (0.55,1.26)                    |
|                                         | 5                    | 0.79 (0.63,0.98)*                                           | 0.96 (0.71,1.29)                            | 0.56 (0.35,0.89)**                  |
|                                         | 6                    | 0.80 (0.62,1.03)                                            | 1.03 (0.74,1.43)                            | 0.54 (0.32,0.91)**                  |
|                                         | 7                    | 0.92 (0.69,1.23)                                            | 1.11 (0.75,1.64)                            | 0.74 (0.41,1.34)                    |
|                                         | >=8                  | 1.07 (0.78,1.47)                                            | 1.29 (0.85,1.97)                            | 0.95 (0.50,1.77)                    |
| per 1 level increase                    | 0.97 (0.93-1.00)*    | 0.99 (0.95-1.04)                                            | 0.94 (0.88-1.00)                            |                                     |
| Body size at 15-<br>men                 | 1                    | 1.20 (0.98,1.47)                                            | 1.32 (1.01,1.72)*                           | 1.17 (0.74,1.85)                    |
|                                         | 2                    | 1                                                           | 1                                           | 1                                   |
|                                         | 3                    | 1.07 (0.91,1.26)                                            | 1.08 (0.87,1.34)                            | 1.27 (0.90,1.79)                    |
|                                         | 4                    | 1.24 (1.04,1.46)*                                           | 1.23 (0.98,1.55)                            | 1.57 (1.10,2.24)*                   |
|                                         | 5                    | 1.28 (1.05,1.56)*                                           | 1.35 (1.04,1.76)*                           | 1.36 (0.88,2.08)                    |
|                                         | >=6                  | 1.43 (1.16,1.77)**                                          | 1.44 (1.08,1.91)**                          | 1.61 (1.03,2.53)*                   |
|                                         | per 1 level increase | 1.06 (1.02-1.10)**                                          | 1.05 (0.99-1.11)                            | 1.10 (1.01-1.20)*                   |
| Body size at 30-<br>men                 | 1                    | 1.37 (0.89,2.09)                                            | 1.77 (1.05,2.99)*                           | 0.81 (0.25,2.66)                    |
|                                         | 2                    | 1                                                           | 1                                           | 1                                   |
|                                         | 3                    | 1.04 (0.85,1.26)                                            | 1.03 (0.79,1.35)                            | 1.18 (0.78,1.78)                    |
|                                         | 4                    | 1.18 (0.98,1.43)                                            | 1.23 (0.95,1.59)                            | 1.45 (0.97,2.18)                    |
|                                         | 5                    | 1.30 (1.07,1.59)*                                           | 1.44 (1.10,1.88)**                          | 1.23 (0.79,1.92)                    |
|                                         | >=6                  | 1.51 (1.20,1.90)**                                          | 1.67 (1.22,2.28)**                          | 1.60 (0.97,2.64)                    |
|                                         | per 1 level increase | 1.10 (1.05-1.15)**                                          | 1.12 (1.06-1.19)**                          | 1.10 (0.99-1.21)                    |
| Body size at<br>cohort baseline-<br>men | 1                    | 1.24 (1.00,1.52)                                            | 1.36 (1.00,1.84)                            | 0.91 (0.58,1.41)                    |
|                                         | 2                    | 1                                                           | 1                                           | 1                                   |
|                                         | 3                    | 0.79 (0.67,0.94)**                                          | 0.98 (0.77,1.25)                            | 0.67 (0.47,0.94)*                   |
|                                         | 4                    | 0.85 (0.72,1.01)                                            | 1.08 (0.85,1.37)                            | 0.71 (0.51,1.00)                    |
|                                         | 5                    | 0.95 (0.79,1.14)                                            | 1.19 (0.92,1.53)                            | 0.87 (0.61,1.25)                    |
|                                         | >=6                  | 1.13 (0.92,1.39)                                            | 1.63 (1.24,2.13)**                          | 0.57 (0.35,0.94)**                  |
| per 1 level increase                    | 0.99 (0.95-1.03)     | 1.07 (1.01-1.13)*                                           | 0.93 (0.85-1.01)                            |                                     |

HR: hazard ratio; Cox regression models adjusted for age, smoking, socioeconomic status, ethnicity, residence, education, opium and number of pregnancies. Body size analyses also adjusted for physical activity at the same age, and vice versa. <sup>a</sup>Excluding accidents, suicide and all other external causes of death. \*p<0.01, \*\*p<0.001

Supplementary Table 2. Cause-specific mortality by body size at ages 30 and cohort start among non-smokers in the Golestan Cohort Study

|                                        |                      | <b>All medical causes<sup>a</sup></b> | <b>Cardiovascular</b> | <b>Cancer</b>      |
|----------------------------------------|----------------------|---------------------------------------|-----------------------|--------------------|
|                                        |                      | <b>HR (95% CI)</b>                    | <b>HR (95% CI)</b>    | <b>HR (95% CI)</b> |
| Body size at 30-<br>women              | 1                    | 0.87 (0.62,1.21)                      | 0.91 (0.59,1.40)      | 1.05 (0.55,2.01)   |
|                                        | 2                    | 1                                     | 1                     | 1                  |
|                                        | 3                    | 0.90 (0.73,1.12)                      | 0.94 (0.71,1.25)      | 1.08 (0.70,1.66)   |
|                                        | 4                    | 1.10 (0.88,1.37)                      | 1.01 (0.75,1.36)      | 1.16 (0.74,1.82)   |
|                                        | 5                    | 1.19 (0.96,1.47)                      | 1.08 (0.81,1.46)      | 1.68 (1.10,2.56)*  |
|                                        | 6                    | 1.37 (1.10,1.70)**                    | 1.47 (1.10,1.97)**    | 1.19 (0.73,1.95)   |
|                                        | 7                    | 1.35 (1.03,1.76)*                     | 1.37 (0.97,1.96)      | 1.10 (0.59,2.04)   |
|                                        | >=8                  | 1.48 (1.12,1.95)**                    | 1.50 (1.04,2.18)*     | 1.45 (0.78,2.69)   |
|                                        | per 1 level increase | 1.08 (1.05-1.12)**                    | 1.09 (1.04-1.13)**    | 1.06 (0.99-1.13)   |
| Body size at cohort<br>start-<br>women | 1                    | 1.18 (0.93,1.49)                      | 1.26 (0.91,1.74)      | 0.87 (0.53,1.43)   |
|                                        | 2                    | 1                                     | 1                     | 1                  |
|                                        | 3                    | 0.95 (0.76,1.19)                      | 1.14 (0.84,1.54)      | 0.76 (0.49,1.19)   |
|                                        | 4                    | 0.83 (0.66,1.05)                      | 0.84 (0.60,1.16)      | 0.85 (0.55,1.31)   |
|                                        | 5                    | 0.81 (0.64,1.03)                      | 0.96 (0.70,1.32)      | 0.56 (0.35,0.90)*  |
|                                        | 6                    | 0.79 (0.61,1.03)                      | 0.99 (0.70,1.41)      | 0.50 (0.29,0.87)** |
|                                        | 7                    | 0.97 (0.71,1.31)                      | 1.12 (0.74,1.68)      | 0.77 (0.42,1.40)   |
|                                        | >=8                  | 1.06 (0.76,1.48)                      | 1.27 (0.82,1.97)      | 0.82 (0.42,1.62)   |
|                                        | per 1 level increase | 0.96 (0.93-1.00)*                     | 0.99 (0.94-1.04)      | 0.93 (0.87-1.00)   |
| Body size at 30-<br>men                | 1                    | 1.30 (0.72,2.34)                      | 1.39 (0.66,2.95)      | 0.50 (0.07,3.77)   |
|                                        | 2                    | 1                                     | 1                     | 1                  |
|                                        | 3                    | 1.00 (0.77,1.30)                      | 0.96 (0.68,1.34)      | 0.96 (0.54,1.69)   |
|                                        | 4                    | 1.18 (0.91,1.52)                      | 1.10 (0.79,1.54)      | 1.48 (0.86,2.53)   |
|                                        | 5                    | 1.18 (0.90,1.55)                      | 1.19 (0.84,1.69)      | 1.14 (0.63,2.05)   |
|                                        | >=6                  | 1.59 (1.18,2.15)**                    | 1.73 (1.18,2.54)**    | 1.38 (0.70,2.72)   |
|                                        | per 1 level increase | 1.10 (1.04-1.17)**                    | 1.12 (1.04-1.22)*     | 1.11 (0.97-1.26)   |
| Body size at cohort<br>start-<br>men   | 1                    | 1.06 (0.71,1.60)                      | 0.88 (0.49,1.59)      | 0.53 (0.18,1.56)   |
|                                        | 2                    | 1                                     | 1                     | 1                  |
|                                        | 3                    | 0.89 (0.67,1.19)                      | 0.96 (0.65,1.41)      | 0.81 (0.44,1.46)   |
|                                        | 4                    | 0.79 (0.59,1.05)                      | 0.86 (0.59,1.25)      | 0.65 (0.36,1.18)   |
|                                        | 5                    | 0.96 (0.72,1.29)                      | 1.04 (0.71,1.53)      | 1.99 (0.55,1.78)   |
|                                        | >=6                  | 1.21 (0.89,1.66)                      | 1.54 (1.04,2.29)*     | 0.72 (0.35,1.48)   |
|                                        |                      | per 1 level increase                  | 1.03 (0.96-1.09)      | 1.16 (1.06-1.26)** |

HR: hazard ratio; Cox regression models adjusted for age, smoking, socioeconomic status, ethnicity, residence, education, opium and number of pregnancies. Body size analyses also adjusted for physical activity at the same age, and vice versa. <sup>a</sup> Excluding accidents, suicide and all other external causes of death. \*p<0.01, \*\*p<0.001

Supplementary Table 3. Sensitivity analysis for mortality due to medical causes by body size and physical activity at cohort baseline in the Golestan Cohort Study

|                                                  | Women                                 |                                                    | Men                                   |                                                    |
|--------------------------------------------------|---------------------------------------|----------------------------------------------------|---------------------------------------|----------------------------------------------------|
|                                                  | Excluding death during the first year | Excluding chronic disease <sup>a</sup> at baseline | Excluding death during the first year | Excluding chronic disease <sup>a</sup> at baseline |
| <b>Body size at cohort baseline</b>              |                                       |                                                    |                                       |                                                    |
| 1                                                | 1.03 (0.81,1.31)                      | 1.00 (0.71,1.41)                                   | 1.17 (0.93,1.47)                      | 1.11 (0.83,1.47)                                   |
| 2                                                | 1                                     | 1                                                  | 1                                     | 1                                                  |
| 3                                                | 0.90 (0.71,1.13)                      | 1.03 (0.74,1.42)                                   | 0.83 (0.69,1.01)                      | 0.84 (0.67,1.06)                                   |
| 4                                                | 0.76 (0.60,0.97)*                     | 0.68 (0.47,0.98)*                                  | 0.87 (0.73,1.05)                      | 0.88 (0.70,1.11)                                   |
| 5                                                | 0.80 (0.63,1.02)                      | 0.67 (0.46,0.97)**                                 | 0.93 (0.77,1.14)                      | 0.83 (0.64,1.09)                                   |
| 6                                                | 0.85 (0.65,1.11)                      | 0.82 (0.55,1.24)                                   | 1.04 (0.83,1.31)                      | 0.88 (0.64,1.22)                                   |
| 7                                                | 0.95 (0.69,1.30)                      | 1.09 (0.67,1.77)                                   | NA                                    | NA                                                 |
| >=8                                              | 0.99 (0.69,1.41)                      | 0.79 (0.40,1.53)                                   | NA                                    | NA                                                 |
| per 1 level increase                             | 0.98 (0.95,1.02)                      | 0.97 (0.94,1.00)                                   | 0.98 (0.94,1.03)                      | 0.99 (0.95,1.02)                                   |
| <b>Level of work activity at cohort baseline</b> |                                       |                                                    |                                       |                                                    |
| 1                                                | 1.39 (0.95,2.02)                      | 1.33 (0.74,2.41)                                   | 1.60 (1.26,2.04)**                    | 1.47 (1.05,2.04)*                                  |
| 2                                                | 1.75 (1.12,2.76)**                    | 1.74 (0.84,3.59)                                   | 1.24 (0.98,1.57)                      | 1.19 (0.87,1.63)                                   |
| 3                                                | 1.12 (0.86,1.47)                      | 1.11 (0.76,1.62)                                   | 0.96 (0.80,1.17)                      | 0.90 (0.70,1.16)                                   |
| 4                                                | 1                                     | 1                                                  | 1                                     | 1                                                  |
| per 1 level increase                             | 0.87 (0.78,0.98)*                     | 0.86 (0.78,0.95)**                                 | 0.88 (0.82,0.94)**                    | 0.89 (0.84,0.95)**                                 |

HR: hazard ratio; Cox regression models adjusted for age, smoking, socioeconomic status, ethnicity, residence, education, opium and number of pregnancies. Body size analyses also adjusted for physical activity and vice versa. Excluding accidents, suicide and all other external causes of death. <sup>a</sup> History of ischemic heart disease, heart failure, cerebrovascular disease, hypertension, diabetes mellitus, chronic pulmonary disease, and cancer.

\*p<0.01, \*\*p<0.001
